# Supplementary material
Source: Research Square preprint supplement (doi:10.21203/rs.3.rs-10247084/v1)
Supplement: Supplementary file 2 [file 12f01f029779a6d718b7a9e8.xlsx]

## Sheet: predictions
File name	Active probability	Prediction category
AN-919_14790001.txt	0.0322	0
AG-205_12759549.txt	0.0418	0
AG-690_11960135.txt	0	0
AG-205_15157016.txt	1	1
AN-989_40683695.txt	0	0
AP-906_42698391.txt	0	0
AO-365_43300667.txt	0	0
AS-871_43475495.txt	0	0
AM-900_40674359.txt	1	1
AN-329_41006645.txt	0.0082	0
AS-871_13465032.txt	0.0106	0
AK-918_42273515.txt	0.9863	1
AO-548_41769328.txt	0	0
AG-690_15439074.txt	0	0
AG-690_40697077.txt	0.0768	0
AP-866_41269676.txt	0	0
AN-465_42519520.txt	0.0001	0
AP-906_43312851.txt	0	0
AG-690_40698323.txt	0	0
AG-690_10384053.txt	0	0
AG-690_11630039.txt	0.0473	0
AG-205_37068077.txt	0	0
AE-848_13422053.txt	0.0001	0
AK-968_13031095.txt	0	0
AN-212_12293168.txt	0.4225	0
AM-807_13614246.txt	0	0
AO-081_41364431.txt	0	0
AG-205_10455009.txt	0.0001	0
AF-399_32023052.txt	0	0
AG-205_33113043.txt	0	0
AE-848_13424460.txt	0	0
AH-487_40686762.txt	0.0023	0
AP-970_42225115.txt	0	0
AG-205_32363063.txt	0	0
AK-968_15360026.txt	0.0027	0
AT-057_10472048.txt	0	0
AE-562_12222600.txt	0	0
AH-487_41139343.txt	0	0
AG-690_33070053.txt	0	0
AO-365_41690501.txt	0	0
AE-848_08320034.txt	0	0
AO-080_42160008.txt	0	0
AN-512_12673374.txt	0	0
AK-968_15361292.txt	0.4754	0
AG-690_40114029.txt	0	0
AF-399_14202048.txt	0	0
AN-979_42723474.txt	0	0
AG-670_40735492.txt	0.0003	0
AK-968_40641935.txt	0	0
AG-389_13258001.txt	0	0
AG-205_36714063.txt	0.0007	0
AT-057_42649916.txt	0	0
AN-329_43385557.txt	0	0
AN-698_41761252.txt	0	0
AK-918_12943030.txt	0	0
AK-968_41922486.txt	0	0
AG-690_11741705.txt	0	0
AN-465_42888218.txt	0	0
AG-690_36273027.txt	0	0
AG-690_09409013.txt	0.0006	0
AQ-390_42869099.txt	0.0439	0
AG-205_09359014.txt	0.8095	1
AE-842_33002003.txt	0	0
AN-652_13120072.txt	0	0
AK-968_15359985.txt	0	0
AM-900_40674070.txt	0.0226	0
AG-205_33105004.txt	0	0
AK-968_40707401.txt	0	0
AG-670_41728540.txt	0.0002	0
AH-034_32855024.txt	0	0
AT-057_43319135.txt	0.0036	0
AF-962_02757004.txt	0	0
AO-476_43415739.txt	0.4486	0
AG-690_11453338.txt	0	0
AJ-292_42034345.txt	0	0
AK-968_13025287.txt	0.001	0
AN-919_41152851.txt	0	0
AA-516_33241059.txt	0	0
AQ-390_43363915.txt	0	0
AH-487_41182650.txt	0	0
AS-871_43476257.txt	0.014	0
AG-690_15438608.txt	0	0
AF-399_13949020.txt	0.0003	0
AT-057_43313870.txt	0	0
AN-329_41928495.txt	0	0
AG-205_12909052.txt	0	0
AN-329_41835923.txt	0	0
AJ-292_41944616.txt	0.8826	1
AN-465_43421961.txt	0.0008	0
AL-398_12677042.txt	0.0093	0
AG-690_15433459.txt	0	0
AJ-292_14129240.txt	0.0028	0
AJ-292_12785026.txt	0	0
AG-219_34602045.txt	0	0
AK-823_41252344.txt	0	0
AF-399_41981244.txt	0	0
AK-968_40707429.txt	0	0
AK-968_41922464.txt	0	0
AO-022_43454133.txt	0	0
AK-968_11565296.txt	0.1093	0
AG-690_12886092.txt	0	0
AK-968_40390279.txt	0	0
AP-263_43412547.txt	0	0
AN-465_43411256.txt	0	0
AM-781_14748024.txt	0.0025	0
AP-124_43383596.txt	0	0
AG-690_09874003.txt	0	0
AN-329_43201118.txt	0	0
AN-698_40716642.txt	0.0923	0
AG-690_11314073.txt	0.0003	0
AG-690_12413400.txt	0.0908	0
AG-205_14141009.txt	0.0013	0
AG-205_32376025.txt	0	0
AO-022_43512811.txt	0	0
AP-263_43412431.txt	0	0
AK-968_40605612.txt	0.0001	0
AN-329_42607705.txt	0	0
AM-807_13614984.txt	0.2103	0
AK-968_15359103.txt	0	0
AN-465_42886517.txt	0	0
AG-690_40749631.txt	0	0
AN-655_14614003.txt	0	0
AG-690_40138077.txt	0.0022	0
AG-690_11083055.txt	0	0
AG-690_15435172.txt	0	0
AK-968_10821026.txt	0	0
AG-690_10024057.txt	0	0
AK-968_41017578.txt	0	0
AG-205_08032019.txt	0	0
AN-465_43369755.txt	0.8874	1
AK-968_12514084.txt	0	0
AG-205_12668050.txt	0.0016	0
AK-968_41017158.txt	0.8003	1
AP-906_42716062.txt	0.0011	0
AG-690_12407142.txt	0	0
AE-848_37018306.txt	0.0004	0
AG-690_36983042.txt	0	0
AN-988_40788206.txt	0	0
AN-212_12565290.txt	0	0
AK-968_41026072.txt	0	0
AK-968_12024020.txt	0	0
AK-778_11811089.txt	0	0
AG-205_11298136.txt	0	0
AG-690_15437944.txt	0	0
AG-690_33072041.txt	0	0
AR-360_42760413.txt	0	0
AG-205_32660025.txt	0	0
AN-698_42147983.txt	0	0
AN-023_14771077.txt	0.0021	0
AK-968_40642464.txt	0	0
AP-501_43059393.txt	0	0
AG-690_40755114.txt	0	0
AS-871_43478585.txt	0	0
AQ-390_41640147.txt	0	0
AN-037_15477073.txt	0	0
AO-365_41329023.txt	0.0083	0
AO-365_43300885.txt	0.9886	1
AI-942_13331256.txt	0.0001	0
AM-807_13615338.txt	0.1264	0
AN-159_12822009.txt	0.0031	0
AH-487_42566847.txt	0	0
AE-848_11420663.txt	0.0007	0
AG-219_33328024.txt	0.0026	0
AN-989_14669117.txt	0.0002	0
AP-263_42611015.txt	0	0
AG-205_09356001.txt	0.0063	0
AO-365_43400839.txt	0.7946	1
AH-262_36795004.txt	0.0077	0
AN-648_15598050.txt	0.0006	0
AG-690_15431828.txt	0	0
AI-211_36556012.txt	0	0
AP-156_15525009.txt	0.0004	0
AK-968_41925680.txt	0	0
AJ-333_09217013.txt	0	0
AT-057_42238826.txt	0	0
AG-690_40697656.txt	0	0
AG-690_37048012.txt	0.0037	0
AF-399_15030069.txt	0	0
AF-399_15030223.txt	0	0
AH-034_11650305.txt	0.1388	0
AK-968_15602018.txt	0	0
AI-204_31683012.txt	0	0
AK-968_15608246.txt	0	0
AK-820_13220555.txt	0	0
AN-512_13501036.txt	0	0
AK-968_40731864.txt	0	0
AN-652_43162735.txt	0	0
AT-057_42767405.txt	0.0031	0
AK-968_11197103.txt	0	0
AG-205_11955150.txt	0.0127	0
AF-399_42384865.txt	0	0
AG-690_12133021.txt	0	0
AQ-750_42050413.txt	0	0
AG-670_32360008.txt	0	0
AE-848_30896040.txt	0.0068	0
AN-329_40484295.txt	0	0
AO-710_14808012.txt	0.0018	0
AG-205_40037580.txt	0	0
AK-968_11367408.txt	0	0
AG-205_40101404.txt	0.0085	0
AK-968_12104185.txt	0	0
AN-698_40710404.txt	0	0
AN-988_40680235.txt	0.6957	1
AP-501_42302443.txt	0	0
AT-057_43469005.txt	0	0
AF-399_42679396.txt	0	0
AE-641_30110052.txt	0	0
AI-020_37280244.txt	0.1966	0
AN-465_43369712.txt	0	0
AK-968_12513022.txt	0	0
AO-365_43467498.txt	0.9948	1
AR-360_42760641.txt	0.0003	0
AO-364_14480086.txt	0.0085	0
AG-690_11303143.txt	0	0
AJ-292_42032245.txt	0	0
AG-777_40171202.txt	0	0
AK-968_40707909.txt	0.0039	0
AP-970_14954217.txt	0	0
AP-263_43502879.txt	0	0
AM-879_12633011.txt	0.0001	0
AP-970_42769873.txt	0.1451	0
AK-918_43446326.txt	0.5786	1
AT-057_43318980.txt	0	0
AG-205_33132008.txt	0.0444	0
AQ-750_42052529.txt	0.0872	0
AG-670_36155017.txt	0.0025	0
AG-690_12764816.txt	0	0
AK-968_41923534.txt	0	0
AE-848_33855045.txt	0.0341	0
AE-848_11829304.txt	0	0
AK-968_41025856.txt	0	0
AS-871_43474825.txt	0	0
AG-205_37175016.txt	0	0
AG-690_12885084.txt	0	0
AG-205_37007464.txt	0.141	0
AK-968_15361388.txt	0.8414	1
AH-034_11364045.txt	0	0
AN-023_13177164.txt	0.7766	1
AG-205_36733003.txt	0	0
AK-105_40691102.txt	0	0
AG-690_12767695.txt	0.0646	0
AG-205_33655001.txt	0.0002	0
AG-205_40045468.txt	0	0
AG-205_07869062.txt	0	0
AK-968_41172147.txt	0	0
AO-990_15068003.txt	0	0
AF-399_15599222.txt	0	0
AP-970_43481812.txt	0	0
AG-690_11039008.txt	0.9359	1
AG-205_33132037.txt	0.0037	0
AH-487_41973621.txt	0	0
AG-690_33368021.txt	0	0
AN-652_41072559.txt	0	0
AK-105_40834915.txt	0	0
AN-651_43112588.txt	0	0
AH-487_40669299.txt	0.0001	0
AG-690_11821067.txt	0.0002	0
AG-205_33163018.txt	0.6812	1
AG-690_12619875.txt	0.0008	0
AG-690_36718040.txt	0	0
AP-263_43418123.txt	0	0
AE-641_41508780.txt	0	0
AG-690_40097215.txt	0.0669	0
AK-918_43446756.txt	0	0
AG-690_34981033.txt	0	0
AN-329_41168829.txt	0.0002	0
AG-690_11548703.txt	0	0
AG-401_40683241.txt	0	0
AO-548_12119336.txt	0	0
AG-205_12762512.txt	0	0
AG-690_15438768.txt	0	0
AG-205_40118523.txt	0	0
AG-690_40698944.txt	0.0074	0
AO-089_13955005.txt	0.0142	0
AE-406_41056202.txt	0.544	1
AG-690_08627029.txt	0	0
AG-690_11306026.txt	0	0
AG-205_36494054.txt	0	0
AN-329_15535048.txt	0	0
AF-407_10636018.txt	0	0
AO-476_40672165.txt	0.0871	0
AK-918_41777589.txt	0	0
AP-970_43483365.txt	0.0001	0
AK-968_15604402.txt	0	0
AO-548_43179548.txt	0	0
AF-399_36428010.txt	0	0
AK-968_12685063.txt	0	0
AS-871_10168050.txt	0.0009	0
AJ-292_15367092.txt	0	0
AG-690_15431671.txt	0	0
AK-968_13027640.txt	0	0
AE-848_34781036.txt	0	0
AT-057_43318247.txt	0	0
AG-690_40815965.txt	0	0
AN-329_43385799.txt	0.0484	0
AG-205_34706052.txt	0	0
AG-205_32244015.txt	0.99	1
AO-548_15256104.txt	0.0005	0
AJ-030_14523336.txt	0	0
AG-690_12242325.txt	0.9998	1
AG-690_12870191.txt	0.0015	0
AG-690_33420053.txt	0.0001	0
AH-262_10236023.txt	0	0
AG-690_11667019.txt	0	0
AP-501_42610340.txt	0.0016	0
AT-057_43468154.txt	0	0
AH-034_07357009.txt	0	0
AH-487_14757865.txt	0.0004	0
AG-205_11370430.txt	0	0
AK-968_11368670.txt	0	0
AG-205_14152040.txt	0	0
AF-399_40712819.txt	0	0
AK-968_41017569.txt	0	0
AE-848_10304024.txt	0.0046	0
AG-690_36757004.txt	0.0001	0
AK-968_43548773.txt	0	0
AG-690_12405039.txt	0.0004	0
AK-918_13281521.txt	0.7693	1
AG-205_08239028.txt	0	0
AP-501_42610331.txt	0.9945	1
AK-968_41016843.txt	0	0
AE-641_30111010.txt	0	0
AG-690_40754546.txt	0.0002	0
AG-205_08520021.txt	0	0
AK-968_15604831.txt	0	0
AN-967_15488073.txt	0	0
AG-205_08231035.txt	0	0
AG-690_12883128.txt	0	0
AN-989_42292845.txt	0	0
AK-968_15362383.txt	0	0
AO-081_42496032.txt	0	0
AG-205_32559050.txt	0	0
AJ-292_42034656.txt	0	0
AP-970_43483219.txt	0	0
AN-153_43310587.txt	0	0
AG-690_11969019.txt	0	0
AQ-149_41584432.txt	0	0
AG-401_42008232.txt	0.1159	0
AK-968_11993181.txt	0	0
AG-690_13507882.txt	0.2554	0
AH-487_15274026.txt	0.0028	0
AP-970_43375612.txt	0.8487	1
AN-648_14912015.txt	0.0001	0
AE-848_32727040.txt	0	0
AK-778_11412027.txt	0	0
AN-329_40887356.txt	0.1999	0
AN-329_40869084.txt	0	0
AE-848_34780007.txt	0.8559	1
AG-205_11868057.txt	0	0
AK-968_11109141.txt	0.0388	0
AG-690_11287022.txt	0	0
AO-022_43452396.txt	0	0
AN-652_13064015.txt	0.27	0
AE-848_37236009.txt	0	0
AG-690_12136533.txt	0	0
AF-399_15128273.txt	0.1087	0
AU-004_43508239.txt	0	0
AK-777_14666001.txt	0	0
AF-399_15599191.txt	0.0205	0
AN-329_43211157.txt	0	0
AK-928_12488024.txt	0.0292	0
AK-968_41922712.txt	0	0
AN-465_43369822.txt	0	0
AG-690_11450770.txt	0	0
AM-807_41929680.txt	0	0
AS-871_43475376.txt	0	0
AE-848_41980459.txt	0.0022	0
AS-871_43475079.txt	0	0
AK-968_40726902.txt	0	0
AG-690_37105003.txt	0	0
AN-465_42767131.txt	0.0004	0
AH-262_34642012.txt	0	0
AK-968_12575767.txt	0.0006	0
AG-690_15432290.txt	0	0
AP-501_43472181.txt	0.0006	0
AK-968_41017413.txt	0	0
AK-968_40730749.txt	0	0
AH-034_33961018.txt	0	0
AK-968_40369349.txt	0.9179	1
AG-205_07772050.txt	0.9921	1
AK-918_11683025.txt	0.5561	1
AG-690_36609019.txt	0	0
AG-205_12761397.txt	0	0
AN-652_41104908.txt	0	0
AM-814_41094810.txt	0.0014	0
AN-652_43161937.txt	0	0
AN-329_13410338.txt	0	0
AE-848_36738016.txt	0.9845	1
AN-465_42768858.txt	0	0
AG-205_11866018.txt	0.0006	0
AG-690_11972161.txt	0	0
AN-652_43265331.txt	0	0
AK-968_12021007.txt	0.9994	1
AQ-750_41789469.txt	0.0003	0
AG-690_37123146.txt	0.0841	0
AG-690_12888056.txt	0	0
AS-871_42055782.txt	0	0
AG-690_40697208.txt	0.0018	0
AJ-291_34004022.txt	0	0
AK-918_43220154.txt	0	0
AE-848_09336012.txt	0	0
AN-465_42767152.txt	0	0
AJ-292_12415032.txt	0	0
AH-487_14754071.txt	0.0006	0
AJ-292_13092041.txt	0	0
AA-504_08378017.txt	0	0
AH-487_40936812.txt	0	0
AK-968_15360662.txt	0.7475	1
AQ-750_41791989.txt	0	0
AM-807_13103169.txt	0.9971	1
AN-465_14013001.txt	0.9661	1
AK-968_41022233.txt	0	0
AN-648_41220839.txt	0	0
AE-848_34326014.txt	0	0
AN-329_43447999.txt	0	0
AG-690_11202032.txt	0	0
AO-081_15571385.txt	0.0245	0
AK-968_15360506.txt	0.1743	0
AG-670_12359866.txt	0	0
AN-648_40682241.txt	0.156	0
AN-648_40682261.txt	0	0
AN-329_11760447.txt	0.0005	0
AO-081_41197626.txt	0	0
AF-399_09020025.txt	0	0
AP-853_43445385.txt	0	0
AG-690_12350059.txt	0.969	1
AK-968_40941264.txt	0	0
AG-690_11669392.txt	0.0013	0
AG-205_33130036.txt	0	0
AN-655_14219015.txt	0	0
AN-465_43411277.txt	0	0
AM-807_14957270.txt	0	0
AK-968_12021022.txt	0.0192	0
AE-406_41056301.txt	0	0
AG-205_34705007.txt	0	0
AK-918_13500025.txt	0	0
AG-690_08589033.txt	0.0001	0
AP-853_43368014.txt	0.0498	0
AI-031_40760666.txt	0.0026	0
AT-057_43313948.txt	0	0
AP-501_43367894.txt	0	0
AN-652_43024630.txt	0	0
AG-690_36702051.txt	0.0001	0
AG-690_11241375.txt	0	0
AN-023_13306078.txt	0.4965	0
AG-690_40755849.txt	0	0
AG-205_36593011.txt	0	0
AK-968_11986059.txt	0	0
AP-970_42444893.txt	0	0
AH-487_41078165.txt	0	0
AN-465_14952265.txt	0.0008	0
AJ-292_14244052.txt	0	0
AG-690_11763034.txt	0.0001	0
AP-501_43502261.txt	0	0
AK-968_11840063.txt	0	0
AK-968_40710238.txt	0	0
AO-548_43196922.txt	0	0
AK-968_15363457.txt	0	0
AN-858_13858002.txt	0	0
AE-406_41056224.txt	0.0001	0
AG-670_13266036.txt	0.0001	0
AS-662_43412924.txt	0	0
AG-205_32376031.txt	0	0
AK-968_12162028.txt	0.0026	0
AK-968_12686148.txt	0.9713	1
AG-670_11759124.txt	0.9444	1
AI-204_31710041.txt	0	0
AH-262_37116002.txt	0.0002	0
AT-057_43469404.txt	0.0001	0
AN-648_15596157.txt	0	0
AN-655_13785001.txt	0	0
AK-918_41944961.txt	0.2804	0
AG-205_06687018.txt	0	0
AP-124_43382895.txt	0	0
AG-690_13701788.txt	0	0
AF-399_41049266.txt	0	0
AP-427_40954588.txt	0.2388	0
AO-548_43179405.txt	0	0
AP-263_41670609.txt	0	0
AE-848_30742027.txt	0	0
AH-262_31958017.txt	0	0
AO-022_43455230.txt	0	0
AK-968_41923171.txt	0.0416	0
AN-329_43448376.txt	0.0001	0
AG-690_15439207.txt	0	0
AO-799_40842459.txt	0.3704	0
AG-690_33475017.txt	0	0
AG-690_12765936.txt	0	0
AN-329_40487564.txt	0	0
AG-670_11415002.txt	0	0
AO-548_43196551.txt	0	0
AP-263_42373558.txt	0	0
AP-970_43202724.txt	0.0004	0
AE-641_40198067.txt	0.9962	1
AN-465_14762008.txt	0	0
AO-022_43390138.txt	0.0001	0
AG-670_40887137.txt	0.8431	1
AG-670_34988017.txt	0	0
AG-690_11085009.txt	0.0001	0
AK-968_12263040.txt	0.109	0
AF-399_14662021.txt	0.0001	0
AK-918_11424013.txt	0	0
AP-263_43491069.txt	0	0
AP-263_43417779.txt	0.0026	0
AU-059_43521758.txt	0	0
AG-205_12009092.txt	0.1721	0
AG-690_12072093.txt	0	0
AG-690_12477577.txt	0.0001	0
AH-487_40686815.txt	1	1
AJ-292_42218283.txt	0	0
AP-283_40634171.txt	0.1153	0
AC-907_34106051.txt	0	0
AO-548_14003569.txt	0	0
AE-848_36080057.txt	0	0
AN-465_43399938.txt	0	0
AG-690_11665127.txt	0.0017	0
AF-399_15128400.txt	0	0
AG-670_36002007.txt	0	0
AQ-405_42300105.txt	0.8803	1
AN-465_43336728.txt	0	0
AG-690_12377395.txt	0	0
AE-848_10314021.txt	0	0
AN-885_41885057.txt	0	0
AK-968_33482018.txt	0.0095	0
AN-698_41495523.txt	0.0011	0
AS-871_42425468.txt	0.1192	0
AS-871_42600792.txt	0	0
AK-918_40989548.txt	0	0
AO-081_15385004.txt	0	0
AG-670_36127042.txt	0.0004	0
AG-690_40093671.txt	0	0
AK-968_40732054.txt	0	0
AP-906_42551162.txt	0	0
AK-968_11841774.txt	0	0
AH-487_41731331.txt	0.0002	0
AK-968_41923366.txt	0.0004	0
AG-205_36494024.txt	0	0
AG-205_09721064.txt	0	0
AK-968_15606062.txt	0	0
AK-968_15359373.txt	0	0
AM-879_41890828.txt	0	0
AO-080_43378998.txt	0.0016	0
AP-263_40778207.txt	0	0
AK-968_12862111.txt	0.4186	0
AQ-390_42131128.txt	0	0
AG-205_07777059.txt	0	0
AG-690_11638215.txt	0	0
AK-918_11238004.txt	0.0008	0
AM-807_13103069.txt	0	0
AH-487_41303939.txt	0	0
AN-329_43450162.txt	0	0
AG-690_40123923.txt	0.0323	0
AJ-030_12105155.txt	0	0
AE-641_30150061.txt	0	0
AE-848_09582029.txt	0	0
AG-690_15431830.txt	0.0001	0
AP-906_41638450.txt	0.9202	1
AG-690_40756665.txt	0	0
AK-968_41021341.txt	0.001	0
AG-205_32618023.txt	0.0005	0
AQ-390_42425744.txt	0	0
AG-205_33175009.txt	0	0
AG-690_15432869.txt	0	0
AB-323_13887269.txt	0	0
AN-648_14354040.txt	0	0
AC-907_34118003.txt	0	0
AM-807_13614866.txt	0.6961	1
AN-329_14085025.txt	0.0003	0
AG-205_07881019.txt	0	0
AJ-292_15008745.txt	0	0
AS-871_43476660.txt	0	0
AG-744_30913034.txt	0.0001	0
AT-057_43300725.txt	0.0088	0
AG-690_40696446.txt	0	0
AG-690_15440290.txt	0	0
AH-982_40918640.txt	0	0
AJ-030_14523264.txt	0	0
AP-501_42302431.txt	0.0001	0
AP-906_42085918.txt	0	0
AP-263_43418134.txt	0	0
AK-968_15363025.txt	0.0352	0
AP-970_42736422.txt	0	0
AO-022_43454929.txt	0.0001	0
AG-205_07885022.txt	0	0
AP-906_42854543.txt	0.0002	0
AN-465_41166552.txt	0	0
AO-022_41754033.txt	0	0
AI-204_31703001.txt	0	0
AG-690_36158043.txt	0	0
AK-968_43543568.txt	0.9831	1
AG-690_40756228.txt	0	0
AH-487_15020029.txt	0.0008	0
AN-698_40705464.txt	0	0
AP-263_41417671.txt	0	0
AO-022_43233469.txt	0	0
AN-329_40396886.txt	0	0
AK-968_15607030.txt	0	0
AK-968_12116531.txt	0.003	0
AE-641_04193050.txt	0	0
AO-081_41699194.txt	0	0
AN-989_40746999.txt	0.0004	0
AK-778_12434031.txt	0.0016	0
AO-854_40108228.txt	0	0
AN-979_41436417.txt	0	0
AG-690_13703952.txt	0	0
AH-487_14757737.txt	0	0
AK-918_11642028.txt	0	0
AK-968_11563002.txt	0.9954	1
AH-262_41702237.txt	0	0
AG-690_11961476.txt	0	0
AO-799_41705369.txt	0	0
AO-567_40862442.txt	0.0001	0
AK-968_12342118.txt	0	0
AN-465_43411439.txt	0.0001	0
AG-690_12767269.txt	0	0
AK-778_43465047.txt	0	0
AG-690_09174013.txt	0	0
AG-205_12496024.txt	0	0
AN-329_43248837.txt	0	0
AG-690_13703746.txt	0	0
AP-263_43503027.txt	0	0
AK-968_41021259.txt	0	0
AG-690_40755436.txt	0	0
AO-365_43401092.txt	0.9971	1
AN-329_40366633.txt	0	0
AP-501_43472176.txt	0.9862	1
AN-329_43449037.txt	0.0612	0
AH-487_15149273.txt	0	0
AE-848_32734016.txt	0	0
AN-646_14187003.txt	0	0
AG-205_36957221.txt	0	0
AP-263_43418441.txt	0.4681	0
AT-057_43318716.txt	0	0
AO-022_42093584.txt	0	0
AK-968_41170784.txt	0.0005	0
AK-968_41923703.txt	0.035	0
AO-081_40763977.txt	0	0
AG-690_12781841.txt	0	0
AP-970_42167287.txt	0.1586	0
AG-205_36594029.txt	0	0
AK-968_41170932.txt	0	0
AS-871_42873317.txt	0	0
AG-690_13775012.txt	0.3621	0
AG-690_40895694.txt	0.0005	0
AG-690_11822803.txt	0	0
AK-968_13408300.txt	0	0
AM-879_41297474.txt	0.2287	0
AG-205_32711012.txt	0	0
AP-970_41598899.txt	0.0002	0
AG-690_12890076.txt	0.9999	1
AH-487_41734491.txt	0	0
AO-022_43455054.txt	0	0
AF-399_40702932.txt	0	0
AK-249_12983104.txt	0	0
AN-329_43449820.txt	0	0
AP-970_43482011.txt	0	0
AF-399_13806194.txt	0	0
AE-848_37125083.txt	0	0
AO-365_42612273.txt	1	1
AK-968_40599625.txt	0.0003	0
AP-263_43419205.txt	0	0
AO-365_15162223.txt	0	0
AH-262_08804003.txt	0	0
AO-022_41987468.txt	0	0
AG-690_12071151.txt	0	0
AK-968_12572007.txt	1	1
AK-968_43569110.txt	0	0
AG-690_11764097.txt	0	0
AI-204_31729015.txt	0.9877	1
AP-970_43274728.txt	0	0
AM-879_40777411.txt	0	0
AK-968_11573177.txt	0	0
AG-690_12763248.txt	0	0
AG-205_33108013.txt	0.0001	0
AN-648_41667036.txt	0	0
AF-962_31930042.txt	0	0
AG-690_40696354.txt	0	0
AI-020_09890024.txt	0	0
AG-205_37386030.txt	0.0003	0
AG-205_07938004.txt	0	0
AN-329_40196325.txt	0	0
AG-205_11611521.txt	0.9975	1
AE-406_41057096.txt	0.0006	0
AL-281_41057356.txt	0.0053	0
AI-204_31694047.txt	0	0
AM-807_41932146.txt	0.9438	1
AG-205_37106220.txt	0	0
AP-653_42201505.txt	0.1266	0
AG-690_15442915.txt	0.0267	0
AK-968_43542268.txt	0	0
AG-690_40721024.txt	0.0003	0
AO-476_43407089.txt	0.0001	0
AT-057_42667084.txt	0.0001	0
AG-690_32531062.txt	0	0
AO-365_43301083.txt	0.9993	1
AO-081_14338156.txt	0	0
AE-848_31925041.txt	0.006	0
AP-906_41640930.txt	0	0
AK-968_41017700.txt	0.0001	0
AE-848_11419465.txt	0	0
AE-848_32102020.txt	0.0001	0
AO-801_41077285.txt	0	0
AN-329_42504606.txt	0	0
AK-968_41024491.txt	0	0
AP-083_15505004.txt	0	0
AK-968_15360266.txt	0.9999	1
AN-329_43385499.txt	0	0
AG-690_36682057.txt	0.0026	0
AK-968_43557821.txt	1	1
AO-365_43401688.txt	0.2646	0
AK-105_40833821.txt	0	0
AN-648_41866938.txt	0	0
AN-988_40680279.txt	0	0
AN-465_15152084.txt	0.0001	0
AN-465_14013011.txt	0	0
AO-081_40681420.txt	0	0
AK-968_43545737.txt	0	0
AG-219_37149047.txt	0.0019	0
AE-848_34088005.txt	0	0
AO-022_43453880.txt	0.9996	1
AP-501_43472136.txt	0.3263	0
AG-690_13701530.txt	0.0005	0
AG-670_37139007.txt	0	0
AI-346_31791005.txt	0	0
AG-205_32388040.txt	0	0
AN-465_42246540.txt	0	0
AN-329_13484004.txt	0	0
AK-918_42486807.txt	0	0
AG-205_13578158.txt	0.0028	0
AG-690_40752312.txt	0.0754	0
AN-465_43013135.txt	0.0001	0
AO-476_43417130.txt	0	0
AO-081_15045286.txt	0	0
AK-968_40709869.txt	0	0
AE-848_33591030.txt	0.1794	0
AK-968_12861075.txt	0	0
AK-968_12100025.txt	0	0
AG-690_13157313.txt	0	0
AK-968_43554021.txt	0	0
AF-407_36938004.txt	0.0011	0
AK-968_15603152.txt	0.9191	1
AQ-360_43019630.txt	0	0
AE-562_12222267.txt	0	0
AG-690_12244034.txt	0	0
AO-081_41194910.txt	0	0
AG-690_36164037.txt	0	0
AN-652_43162690.txt	0	0
AO-081_15570083.txt	0	0
AJ-292_40930723.txt	0.0001	0
AF-399_40806158.txt	0	0
AJ-292_41694184.txt	0	0
AE-641_02474052.txt	0	0
AK-968_12513065.txt	0.1835	0
AJ-292_40706553.txt	0	0
AK-968_40709093.txt	0.0002	0
AG-205_07804002.txt	0.0021	0
AN-655_15003673.txt	0.0014	0
AK-968_11368848.txt	0	0
AE-848_12124835.txt	0	0
AK-968_41024543.txt	0	0
AG-670_11900036.txt	0	0
AG-927_13304748.txt	0	0
AE-848_11105270.txt	0	0
AG-205_11188962.txt	0.0084	0
AG-389_15455091.txt	0.0001	0
AH-357_03519057.txt	0	0
AS-871_43477206.txt	0.2706	0
AK-968_41025607.txt	0.009	0
AP-501_42002264.txt	0.3932	0
AG-690_33090040.txt	0.079	0
AE-848_02290004.txt	0	0
AG-205_33165002.txt	0.0941	0
AM-879_42240722.txt	0.0007	0
AG-205_14349102.txt	0	0
AN-329_42612962.txt	0	0
AG-690_40750365.txt	0	0
AN-698_41741927.txt	0.0053	0
AN-652_40803129.txt	0	0
AG-205_32979061.txt	0.0677	0
AK-080_41630510.txt	0	0
AG-205_07635014.txt	0.7788	1
AP-906_41882871.txt	0.0009	0
AN-652_43340320.txt	0.0021	0
AG-205_07920055.txt	0	0
AN-465_42886494.txt	0	0
AE-641_13212008.txt	0.0512	0
AI-020_34063005.txt	0.0002	0
AK-968_40730098.txt	0	0
AK-968_12116386.txt	0	0
AN-465_12850029.txt	0	0
AE-842_34027006.txt	0.0004	0
AS-871_43476201.txt	0	0
AN-988_41078546.txt	0	0
AL-281_15328003.txt	0	0
AN-465_12849017.txt	0.0102	0
AT-057_43318411.txt	0	0
AG-690_37025005.txt	0	0
AE-641_14714168.txt	0	0
AN-329_11154163.txt	0	0
AO-365_43400868.txt	0.0003	0
AO-022_43512952.txt	0.0276	0
AK-968_41021722.txt	0.9638	1
AG-205_36594036.txt	0.0478	0
AP-970_42887640.txt	0	0
AN-465_43369435.txt	0.763	1
AK-968_13030112.txt	0	0
AO-081_42038785.txt	0	0
AP-083_41417210.txt	0	0
AF-399_14863035.txt	0	0
AK-918_11642007.txt	0	0
AN-023_13177035.txt	0	0
AK-968_15362261.txt	0.0003	0
AJ-292_41686515.txt	0.0001	0
AG-670_40727357.txt	0	0
AG-205_07869035.txt	0.0001	0
AP-828_41268545.txt	0.6829	1
AE-848_12124135.txt	0	0
AO-476_42169337.txt	0	0
AN-465_41994939.txt	0	0
AI-020_37280031.txt	0	0
AG-690_11636016.txt	0	0
AK-968_15359794.txt	0.0001	0
AN-648_15100229.txt	0	0
AK-968_11197123.txt	0	0
AK-968_43567868.txt	0	0
AG-690_08989043.txt	0	0
AG-690_37054054.txt	0.0001	0
AM-807_13104339.txt	0	0
AK-968_40336843.txt	0	0
AO-365_42320504.txt	0	0
AO-081_40800029.txt	0	0
AJ-916_13002057.txt	0.0076	0
AG-205_14141052.txt	0.0001	0
AG-690_36878035.txt	0.0001	0
AK-968_11369054.txt	0	0
AO-022_43513972.txt	0	0
AN-465_41401522.txt	0.9991	1
AK-968_41172195.txt	0	0
AG-205_32578046.txt	0.286	0
AP-263_43479497.txt	0	0
AF-962_31930019.txt	0	0
AK-968_15610359.txt	0.0001	0
AO-700_14702003.txt	0.9886	1
AH-034_11963309.txt	0.0027	0
AK-968_40733739.txt	0	0
AG-690_36540053.txt	0	0
AN-652_40797544.txt	0	0
AN-329_42286067.txt	0	0
AG-690_15433649.txt	0	0
AP-263_43502692.txt	0	0
AG-690_36389001.txt	0	0
AH-034_34344008.txt	0.0373	0
AP-501_43179266.txt	0.0453	0
AG-205_12910606.txt	0	0
AJ-292_37229009.txt	0.9795	1
AG-205_32459019.txt	0	0
AR-422_41663951.txt	0.6703	1
AF-826_12020007.txt	0	0
AG-690_12247018.txt	0.0801	0
AM-900_40875564.txt	0.9833	1
AN-329_43449240.txt	0	0
AE-641_00653023.txt	0.0453	0
AG-690_09247051.txt	0	0
AK-099_36379017.txt	0.0674	0
AK-968_40940132.txt	0	0
AO-081_14336044.txt	0	0
AS-871_43476514.txt	0	0
AG-205_12610026.txt	0	0
AG-690_40115382.txt	0	0
AN-329_42955566.txt	0	0
AP-970_43375858.txt	0	0
AN-329_41647287.txt	1	1
AO-081_14456310.txt	0.9014	1
AB-337_13036321.txt	0	0
AN-698_41741984.txt	0	0
AN-919_14229235.txt	0.4845	0
AG-690_40754551.txt	0	0
AP-501_43059401.txt	0.0014	0
AG-205_32389041.txt	0	0
AG-690_12557837.txt	0.9936	1
AN-465_41683413.txt	0	0
AK-968_12346354.txt	0.0001	0
AO-079_14332004.txt	0	0
AN-329_43448495.txt	0.0015	0
AJ-292_42034621.txt	0.0001	0
AG-690_13705072.txt	0.0086	0
AG-690_40135649.txt	0	0
AO-476_43201328.txt	0	0
AE-641_02511010.txt	0.9672	1
AP-263_41417747.txt	0	0
AN-329_40840026.txt	0	0
AP-501_43300365.txt	0.9999	1
AG-205_07943027.txt	0.9761	1
AG-690_11450058.txt	0	0
AG-205_08526044.txt	0	0
AK-918_11642081.txt	0	0
AQ-390_42869084.txt	0.0046	0
AO-476_43250010.txt	0.0003	0
AH-487_40687157.txt	0	0
AK-968_15253476.txt	0	0
AN-329_43385473.txt	0.1751	0
AT-057_43275272.txt	0	0
AF-399_15024062.txt	0	0
AM-807_14146063.txt	0	0
AP-853_42423488.txt	0	0
AP-782_41885471.txt	0	0
AK-105_40690244.txt	0	0
AG-690_11741671.txt	0.0654	0
AN-740_37278012.txt	1	1
AE-848_33210018.txt	0	0
AL-281_42731219.txt	0.0364	0
AE-848_31999059.txt	0.0017	0
AG-690_36958024.txt	0	0
AF-399_40702922.txt	0	0
AO-080_43441944.txt	0	0
AN-512_12673300.txt	0	0
AO-854_43466848.txt	0	0
AE-848_30862041.txt	0.0142	0
AG-205_13184046.txt	0	0
AO-854_15065004.txt	0.0006	0
AG-690_40751453.txt	0	0
AP-970_43268278.txt	0	0
AG-690_36278011.txt	0.0853	0
AP-124_41669694.txt	0	0
AG-777_40170872.txt	0	0
AG-690_40696671.txt	0	0
AN-329_40688255.txt	0	0
AN-652_04444001.txt	0	0
AF-399_15539301.txt	0.9493	1
AG-690_10801019.txt	0	0
AG-205_36953187.txt	0	0
AO-365_43515968.txt	0.0016	0
AR-422_42875234.txt	0.0036	0
AG-690_36550002.txt	0.0037	0
AG-389_15452433.txt	0.9915	1
AP-970_43482165.txt	0	0
AK-968_15607200.txt	0.0069	0
AN-465_41991184.txt	0	0
AG-690_40128625.txt	0.0002	0
AE-842_34030037.txt	0.9547	1
AJ-292_13890813.txt	0.0016	0
AG-690_11629439.txt	0.0001	0
AK-918_14550045.txt	0	0
AO-081_15043040.txt	0	0
AG-690_40700185.txt	0	0
AN-989_14834071.txt	0	0
AG-690_15439463.txt	0	0
AS-871_43477594.txt	0	0
AH-262_08373026.txt	0	0
AK-968_41926921.txt	1	1
AK-968_41021177.txt	0.0067	0
AK-968_11987103.txt	0	0
AO-702_14733022.txt	0	0
AK-968_40642698.txt	0.7615	1
AG-205_14740142.txt	0	0
AG-690_40749761.txt	0.0194	0
AG-205_07813028.txt	0.0001	0
AF-399_13567388.txt	0.9984	1
AP-263_43412365.txt	0	0
AG-690_10291005.txt	0	0
AN-329_41006928.txt	0	0
AH-487_41976599.txt	0	0
AO-299_15458119.txt	0	0
AH-487_14755973.txt	0	0
AG-690_37071329.txt	0	0
AP-970_43519390.txt	0	0
AG-205_10455043.txt	0	0
AK-968_15609898.txt	0.0482	0
AG-205_13056142.txt	0.0003	0
AG-690_40749861.txt	0.0007	0
AI-204_31753027.txt	0.2172	0
AK-968_41026116.txt	0	0
AO-022_42313192.txt	0	0
AG-690_12765336.txt	0.9049	1
AK-968_43550177.txt	0	0
AN-329_42581087.txt	0	0
AH-034_11650262.txt	0	0
AG-205_13360422.txt	0	0
AG-690_40137176.txt	0.0079	0
AG-690_09708002.txt	0	0
AF-399_11787273.txt	0	0
AP-263_42373734.txt	0	0
AG-690_11821786.txt	0	0
AK-968_43568843.txt	0	0
AO-080_42577279.txt	0	0
AG-205_15424060.txt	0.01	0
AG-205_33651061.txt	0.0175	0
AU-004_43508015.txt	0.0001	0
AG-690_40749655.txt	0	0
AT-057_43240265.txt	0	0
AP-906_43302552.txt	0	0
AG-219_11941009.txt	0	0
AK-968_12096020.txt	0	0
AG-205_04548063.txt	0	0
AG-690_12767585.txt	0.0001	0
AP-970_42896398.txt	0	0
AF-399_13567236.txt	0	0
AP-906_43238858.txt	0.3165	0
AK-968_40941385.txt	0	0
AE-641_40791284.txt	0	0
AK-918_41230295.txt	0	0
AF-399_42289945.txt	0	0
AE-848_34089007.txt	0	0
AG-205_13867464.txt	0	0
AO-435_41051454.txt	0	0
AG-690_09688058.txt	0	0
AM-900_13308003.txt	0	0
AG-690_36160012.txt	0.0003	0
AO-081_41758028.txt	0	0
AK-564_15482027.txt	0	0
AG-690_40749263.txt	0.001	0
AN-329_40863776.txt	0.9471	1
AN-329_40258067.txt	0	0
AG-205_15425272.txt	0.0001	0
AG-690_08696001.txt	0.3882	0
AF-399_36407012.txt	0	0
AG-205_36484041.txt	0	0
AK-968_40391772.txt	0	0
AK-968_36845037.txt	1	1
AG-690_12765718.txt	0	0
AN-329_41402651.txt	0	0
AK-968_41022452.txt	0.0001	0
AP-906_42287275.txt	0	0
AG-219_08405032.txt	0.9987	1
AG-690_12883435.txt	0	0
AP-970_40145267.txt	0.0001	0
AG-690_11633195.txt	0.1102	0
AK-968_12385033.txt	0	0
AN-465_15401003.txt	0.0001	0
AN-698_41889858.txt	0.0026	0
AK-968_40726451.txt	0	0
AG-670_41728624.txt	0	0
AG-219_37149018.txt	0.0002	0
AN-465_42244196.txt	0.9901	1
AF-399_15284170.txt	0	0
AN-648_41078459.txt	0	0
AN-329_11609087.txt	0.1063	0
AE-848_42024087.txt	0	0
AK-968_40730141.txt	0	0
AG-690_11822386.txt	0	0
AG-690_11999034.txt	0	0
AG-205_37218009.txt	0	0
AO-022_42435122.txt	0	0
AK-777_36976054.txt	0	0
AP-970_42000582.txt	0.068	0
AN-465_42889080.txt	0.1469	0
AG-205_07680014.txt	0	0
AG-690_13706415.txt	0.7779	1
AN-652_43163717.txt	0.9441	1
AG-205_12125138.txt	0	0
AO-476_43407053.txt	0	0
AK-968_41017222.txt	0	0
AJ-292_41424093.txt	0	0
AE-641_00348026.txt	0.5271	1
AP-501_43363283.txt	0	0
AN-885_41885019.txt	0.0002	0
AG-670_36130034.txt	0	0
AP-906_41027449.txt	0	0
AG-227_14464108.txt	0	0
AS-871_41343144.txt	0	0
AG-690_40749495.txt	0	0
AG-205_37136052.txt	0	0
AF-399_15599093.txt	0	0
AT-057_43318742.txt	0	0
AJ-292_37222022.txt	0	0
AE-848_08502017.txt	0.1288	0
AO-365_43473243.txt	0.9901	1
AG-205_33170033.txt	0.0002	0
AG-205_25005659.txt	0.0001	0
AO-080_11607075.txt	0.1268	0
AK-968_41924105.txt	0	0
AG-690_40753167.txt	0.5458	1
AG-690_09411029.txt	0	0
AG-670_36149021.txt	0.0001	0
AQ-086_43457610.txt	0	0
AG-205_09995008.txt	0	0
AN-212_12294098.txt	0	0
AJ-292_12941416.txt	0.0301	0
AG-690_13116083.txt	0	0
AO-548_43196647.txt	0.2577	0
AG-670_12148017.txt	0.289	0
AK-968_15364264.txt	0	0
AG-670_13389034.txt	0	0
AG-690_11663950.txt	0	0
AO-365_11865517.txt	0	0
AG-670_37104059.txt	0.0001	0
AP-064_41684654.txt	0	0
AN-329_43448300.txt	0.0133	0
AN-652_41267818.txt	0.0166	0
AG-205_37022017.txt	0	0
AE-848_08582016.txt	0	0
AF-399_41669492.txt	0	0
AK-105_40836552.txt	0	0
AN-329_14788004.txt	0	0
AO-476_43407309.txt	0	0
AN-465_43421626.txt	0	0
AO-854_11607306.txt	0	0
AF-399_33325038.txt	0.0586	0
AP-263_42610818.txt	0	0
AG-690_40638076.txt	0	0
AN-979_15447102.txt	0.0026	0
AK-105_40832393.txt	0	0
AA-504_33804049.txt	0.0227	0
AG-389_13475004.txt	0	0
AG-690_12765094.txt	0.0001	0
AK-968_13411136.txt	0	0
AP-263_41967936.txt	0	0
AG-690_40720691.txt	0	0
AG-690_11351796.txt	0	0
AM-879_15551142.txt	0	0
AP-782_41885343.txt	0	0
AN-308_15495012.txt	0	0
AO-081_41229411.txt	0.0005	0
AG-690_12888961.txt	0	0
AP-906_41249420.txt	0	0
AG-389_41780594.txt	0	0
AG-205_32574021.txt	0.0316	0
AO-365_43463303.txt	0.0046	0
AG-205_40120036.txt	0.1859	0
AO-780_14903019.txt	0	0
AG-227_14464128.txt	0.0179	0
AP-355_42125559.txt	0.5249	1
AE-842_32631036.txt	0	0
AF-407_41276339.txt	0.0002	0
AP-263_43418378.txt	0	0
AO-548_43179598.txt	0.6872	1
AH-283_32869008.txt	0.0091	0
AP-124_43383214.txt	0	0
AN-646_15216002.txt	0.0001	0
AM-879_40777429.txt	0.3563	0
AF-399_41725425.txt	0.2667	0
AE-641_05538020.txt	0	0
AF-399_41725099.txt	0.9913	1
AP-970_42777359.txt	0	0
AK-968_11368786.txt	0	0
AN-329_43449520.txt	0	0
AG-670_11899277.txt	0	0
AE-848_37051051.txt	0.0002	0
AN-023_14771006.txt	0.0637	0
AF-399_13278030.txt	0	0
AG-690_11932007.txt	0.991	1
AG-690_11665182.txt	0	0
AK-968_41923804.txt	0	0
AG-205_12759710.txt	0	0
AO-081_41965281.txt	0	0
AH-487_42821555.txt	0	0
AS-871_40212617.txt	0.0169	0
AG-205_11299520.txt	0	0
AN-708_37371002.txt	0	0
AN-989_13792007.txt	0.0006	0
AG-205_33006016.txt	0.0017	0
AT-057_41675257.txt	0	0
AP-906_41928272.txt	0	0
AN-329_13027715.txt	0	0
AO-854_43461158.txt	0	0
AG-205_11552044.txt	0.0238	0
AK-968_40732878.txt	0	0
AG-690_12782060.txt	0	0
AS-871_43476522.txt	0	0
AK-968_11110518.txt	0.3717	0
AN-465_43410940.txt	0	0
AP-970_43482878.txt	0.9111	1
AG-690_36166038.txt	0	0
AG-667_11910003.txt	0	0
AE-641_00552008.txt	0	0
AK-778_43115080.txt	0	0
AN-922_40702574.txt	0	0
AO-022_43513425.txt	0	0
AS-871_43476915.txt	0	0
AP-845_41402460.txt	0	0
AE-848_30721036.txt	0.9906	1
AN-329_43211281.txt	0	0
AK-968_15359150.txt	0.9215	1
AP-906_42287436.txt	0	0
AN-329_42607784.txt	0.0236	0
AE-641_11150780.txt	0.9928	1
AG-690_12887777.txt	0	0
AK-968_41026260.txt	0	0
AP-263_41028090.txt	0	0
AJ-292_37222014.txt	0	0
AM-807_12739031.txt	0	0
AG-205_12229373.txt	0	0
AH-262_34398035.txt	0	0
AN-329_43449601.txt	0.0002	0
AE-848_08321062.txt	0	0
AK-918_12271023.txt	0.9683	1
AN-329_41573044.txt	0	0
AG-690_36881013.txt	0	0
AG-205_14553069.txt	0	0
AG-690_40750502.txt	0	0
AT-051_43421303.txt	0.0094	0
AK-968_12162023.txt	0.0339	0
AE-848_30538028.txt	0.0005	0
AT-057_43318881.txt	0	0
AG-205_12014113.txt	0	0
AE-848_32606020.txt	0.2117	0
AN-308_15495048.txt	0.0456	0
AE-848_08812063.txt	0	0
AO-080_43378403.txt	0	0
AH-487_41040352.txt	0.0002	0
AK-968_41021492.txt	0	0
AH-262_37240007.txt	0.013	0
AI-204_43372089.txt	0.002	0
AF-399_14183067.txt	0	0
AG-690_13704333.txt	0.0022	0
AN-329_42295017.txt	0	0
AP-970_42167181.txt	1	1
AP-828_41268759.txt	0	0
AK-777_11501148.txt	0.9285	1
AN-329_40564139.txt	0	0
AG-690_09873042.txt	0	0
AE-848_36913055.txt	0	0
AI-942_13331221.txt	0	0
AK-105_40837478.txt	0	0
AO-022_43453606.txt	0	0
AA-768_34977008.txt	0	0
AG-690_33076060.txt	0	0
AO-365_43113667.txt	0.9998	1
AK-968_12385744.txt	0.0005	0
AN-648_40740481.txt	0	0
AI-204_34841005.txt	0.0023	0
AK-968_41017244.txt	0.9835	1
AN-465_43369893.txt	0	0
AG-670_10215023.txt	0	0
AG-690_12888161.txt	0	0
AN-329_43448617.txt	0	0
AF-399_42920880.txt	0.0002	0
AE-562_12222134.txt	0	0
AG-690_36487019.txt	0	0
AG-205_08246010.txt	0	0
AN-655_14572007.txt	0.2283	0
AJ-292_12443089.txt	0.8474	1
AQ-149_41320170.txt	0	0
AG-227_37320015.txt	1	1
AK-968_41923324.txt	0	0
AK-968_13146135.txt	0	0
AO-022_43454566.txt	0	0
AH-487_42142687.txt	0	0
AD-310_37069063.txt	0	0
AK-968_41925742.txt	0	0
AP-263_41417679.txt	0	0
AE-848_11419048.txt	0.0014	0
AN-329_40024359.txt	0	0
AG-205_36564022.txt	0	0
AG-205_36915101.txt	0.0014	0
AK-968_12024041.txt	0.9999	1
AG-690_40756557.txt	0.0001	0
AG-205_40017473.txt	1	1
AG-690_11203225.txt	0	0
AK-968_43547972.txt	0	0
AF-399_37271039.txt	0.0012	0
AE-848_08324009.txt	0.3029	0
AF-886_31091055.txt	0	0
AG-690_11662172.txt	0	0
AE-848_34779020.txt	0	0
AM-879_13391011.txt	0	0
AH-034_11365829.txt	0	0
AG-670_37216002.txt	0	0
AP-970_42767588.txt	0	0
AN-329_41583769.txt	0.0001	0
AP-064_42207981.txt	0	0
AP-501_42861931.txt	0	0
AE-848_34293029.txt	0.0013	0
AK-918_41759680.txt	0.8368	1
AP-906_41245580.txt	0	0
AG-690_08563049.txt	0	0
AK-778_41182460.txt	0	0
AH-487_41826227.txt	0	0
AG-690_40721526.txt	0	0
AK-105_40689397.txt	0.309	0
AG-205_33662011.txt	0.0006	0
AG-690_11190032.txt	0	0
AG-205_07654059.txt	0	0
AP-263_10167048.txt	0.0001	0
AG-690_36644001.txt	0.0003	0
AN-989_40683544.txt	0.0001	0
AF-399_41319505.txt	0.001	0
AK-968_15363392.txt	0.0097	0
AG-690_08311039.txt	0	0
AP-263_43411930.txt	0	0
AN-329_41942551.txt	0	0
AE-848_36080001.txt	0.0004	0
AO-081_42095935.txt	0	0
AK-777_12226079.txt	0.0003	0
AG-690_15438289.txt	0	0
AN-465_40769707.txt	0	0
AF-399_15539117.txt	0	0
AQ-149_43414547.txt	0.0008	0
AO-095_42800785.txt	0	0
AG-690_12089010.txt	0.0159	0
AN-329_14085084.txt	0	0
AG-690_12883557.txt	0	0
AM-879_12976011.txt	0	0
AK-105_40833266.txt	0	0
AG-205_37007327.txt	0	0
AF-962_31929008.txt	0	0
AE-848_10573054.txt	0	0
AO-022_42124226.txt	0	0
AK-968_40939743.txt	0	0
AG-205_12085096.txt	0.0001	0
AS-871_43478537.txt	0	0
AK-778_12433048.txt	0.071	0
AK-968_13408145.txt	0.0018	0
AP-970_42837878.txt	0	0
AP-048_41435552.txt	0.0001	0
AP-970_40998961.txt	0	0
AG-455_02205016.txt	0.0003	0
AP-970_13861281.txt	0.0006	0
AQ-390_42708956.txt	0	0
AN-698_40716548.txt	0.1736	0
AK-105_40832422.txt	0	0
AG-670_40872641.txt	0	0
AS-871_43475026.txt	0	0
AF-399_12927077.txt	0	0
AT-057_43314100.txt	0	0
AN-465_42833557.txt	0	0
AG-205_14552018.txt	0	0
AK-918_41777623.txt	0.9998	1
AG-690_15438150.txt	0.0008	0
AE-848_42024417.txt	0	0
AP-970_43253633.txt	0	0
AG-205_40649500.txt	0	0
AG-690_08508055.txt	0	0
AS-871_43478078.txt	0	0
AJ-292_40857558.txt	0	0
AO-022_43514551.txt	0.0005	0
AG-690_12893130.txt	0	0
AG-690_13388071.txt	0	0
AE-848_37018014.txt	0.7931	1
AO-800_41069648.txt	0.0001	0
AG-205_08214035.txt	0	0
AG-690_40751212.txt	0.0002	0
AP-853_43445353.txt	0	0
AN-329_43449810.txt	0.0049	0
AE-641_30157048.txt	0	0
AN-465_43411605.txt	0.0001	0
AN-329_40924919.txt	0	0
AE-641_00363014.txt	0	0
AQ-390_41638140.txt	0.1043	0
AF-399_43343734.txt	0.0001	0
AK-968_40709527.txt	0	0
AG-205_33645029.txt	0	0
AH-262_31834052.txt	0	0
AH-487_41663068.txt	0	0
AN-465_43411623.txt	0	0
AK-968_41026055.txt	0	0
AG-205_07903018.txt	0	0
AO-081_40799907.txt	0.0035	0
AN-153_43266013.txt	0.0001	0
AG-690_40640193.txt	0.0442	0
AP-970_42837880.txt	0	0
AA-516_25012155.txt	0	0
AP-906_41078767.txt	0	0
AG-205_09994049.txt	0	0
AG-205_37049126.txt	0.0002	0
AO-022_43513627.txt	0	0
AG-205_07444027.txt	0.0023	0
AN-329_40196045.txt	0	0
AK-968_13120050.txt	0	0
AK-968_41927008.txt	0	0
AK-968_41022185.txt	0	0
AN-329_11302022.txt	0.2224	0
AP-845_42282956.txt	0	0
AO-081_41229163.txt	0	0
AG-690_11303116.txt	0	0
AF-399_41508288.txt	0	0
AN-988_40667403.txt	0	0
AE-848_34776023.txt	0	0
AQ-149_43285004.txt	0	0
AG-205_10456024.txt	0	0
AG-690_11351551.txt	0	0
AO-365_43515775.txt	0.9755	1
AP-263_42373525.txt	0	0
AG-690_12765491.txt	0.0001	0
AG-690_12409281.txt	0	0
AH-487_41708799.txt	0	0
AP-501_43408881.txt	0	0
AK-968_40629776.txt	0	0
AG-205_15157602.txt	0	0
AQ-009_42173810.txt	0	0
AG-670_12919026.txt	0	0
AG-690_40701288.txt	0	0
AG-690_11547025.txt	0	0
AE-641_01116044.txt	0.0098	0
AN-465_42887952.txt	0	0
AN-584_11222230.txt	0	0
AG-690_15439584.txt	0	0
AF-399_37112053.txt	0.6335	1
AN-465_42535528.txt	0	0
AG-205_36992030.txt	0	0
AN-988_14769016.txt	0.8433	1
AG-205_32431057.txt	0	0
AO-365_40892284.txt	0	0
AG-690_33057064.txt	0	0
AG-205_11187059.txt	0.0001	0
AG-205_11372498.txt	0.0145	0
AN-465_42768823.txt	0	0
AK-778_36975023.txt	0	0
AG-690_36740006.txt	0.0001	0
AN-465_15152127.txt	0.0171	0
AN-652_12810609.txt	0	0
AN-584_43492663.txt	0.0023	0
AP-906_41638445.txt	0.0056	0
AK-968_11367491.txt	0	0
AF-399_15030232.txt	0.0019	0
AK-968_11567614.txt	0	0
AE-473_30364029.txt	0	0
AO-299_15048155.txt	0.0024	0
AO-080_41039351.txt	0.0001	0
AO-854_43486508.txt	0	0
AN-465_42886879.txt	0	0
AG-690_33091041.txt	0	0
AP-970_43483307.txt	0	0
AG-690_34653026.txt	0	0
AK-968_12685041.txt	0	0
AN-329_43448548.txt	0	0
AG-690_12890185.txt	0.0032	0
AN-512_12673301.txt	0	0
AG-690_32515062.txt	0.9926	1
AO-364_37357044.txt	0	0
AK-968_41926918.txt	0	0
AG-690_11314063.txt	0.0017	0
AI-204_31688037.txt	0	0
AK-968_41025235.txt	0	0
AT-057_43468511.txt	0	0
AG-401_43410803.txt	0.0298	0
AO-548_10923053.txt	0	0
AG-690_40753970.txt	0.0023	0
AE-641_32251008.txt	0.1264	0
AN-023_12770049.txt	0.0001	0
AG-205_33141031.txt	0	0
AH-487_36972020.txt	0	0
AH-487_15275027.txt	0	0
AN-465_43411138.txt	0	0
AP-853_43368093.txt	0	0
AQ-360_42595725.txt	0	0
AN-329_12846694.txt	0	0
AG-690_13507141.txt	0.0062	0
AK-968_12687118.txt	0.0189	0
AO-022_43514376.txt	0	0
AK-968_12163045.txt	0.2029	0
AQ-390_42699069.txt	0	0
AG-205_32981053.txt	0	0
AK-968_41017050.txt	0.0001	0
AC-907_25014385.txt	0	0
AO-476_40672090.txt	0.6169	1
AN-652_40131016.txt	0	0
AK-968_13024047.txt	0.9941	1
AG-389_14950001.txt	0	0
AK-968_15254581.txt	0	0
AP-501_43408825.txt	0.0026	0
AR-422_41598850.txt	0	0
AN-953_13444011.txt	0	0
AR-299_42656365.txt	0.9417	1
AG-670_36669027.txt	0.0001	0
AG-690_40720080.txt	0	0
AN-329_41770245.txt	0	0
AP-518_41793835.txt	0	0
AT-057_43318705.txt	0	0
AJ-292_41079914.txt	0.0007	0
AK-918_43446679.txt	0	0
AS-871_43478095.txt	0.6883	1
AO-080_41810460.txt	0.6771	1
AG-690_11480205.txt	0	0
AG-205_12759844.txt	0.0001	0
AK-968_15361468.txt	0.0003	0
AE-848_01011041.txt	0	0
AG-690_36165024.txt	0	0
AK-918_13073002.txt	0.0009	0
AN-655_13533016.txt	0.0209	0
AG-690_13156357.txt	0	0
AF-407_12250037.txt	0	0
AH-487_41186461.txt	0	0
AP-124_41972215.txt	0	0
AP-064_43237338.txt	0.0087	0
AK-968_40707990.txt	0	0
AQ-776_42801445.txt	0.0455	0
AP-906_42845748.txt	0.0037	0
AF-826_13560002.txt	0.0009	0
AF-399_41704772.txt	0.0001	0
AG-690_36549060.txt	0.001	0
AH-262_06870020.txt	0.0002	0
AI-204_43489625.txt	0	0
AG-690_34684060.txt	0.0058	0
AG-690_15440378.txt	0	0
AK-080_43462007.txt	0	0
AG-690_13507467.txt	0	0
AN-329_43385893.txt	0.0088	0
AO-081_41934564.txt	0	0
AK-968_15359377.txt	0.8354	1
AG-690_15428870.txt	0.0002	0
AS-871_41501813.txt	0	0
AE-848_42278523.txt	0.8986	1
AJ-333_09214001.txt	0	0
AK-968_41025720.txt	0	0
AN-329_15333025.txt	0	0
AJ-292_42648226.txt	0	0
AK-968_15361496.txt	0	0
AG-205_36628034.txt	0	0
AK-968_36801056.txt	0	0
AF-399_15284440.txt	0	0
AN-023_14771031.txt	0	0
AG-227_37320032.txt	0	0
AS-871_42601543.txt	0	0
AK-968_12571026.txt	0	0
AG-690_33366049.txt	0.0025	0
AK-968_41926883.txt	0	0
AN-329_40613943.txt	0.0024	0
AO-476_15509006.txt	0	0
AG-690_15440490.txt	0	0
AK-968_37109040.txt	0.0038	0
AO-623_14653206.txt	0	0
AE-848_36198002.txt	0	0
AP-853_41701120.txt	0	0
AG-690_15432590.txt	0	0
AG-205_40076979.txt	0.0008	0
AG-690_11839683.txt	0	0
AG-690_40753685.txt	0.0008	0
AG-690_40697879.txt	0	0
AN-329_12343957.txt	0	0
AH-487_40935704.txt	0.0001	0
AN-329_40475569.txt	0	0
AK-968_41022181.txt	0	0
AK-777_11501150.txt	0.9986	1
AK-968_40642065.txt	0	0
AH-487_41802014.txt	0	0
AK-968_41025137.txt	0	0
AN-329_40925113.txt	0	0
AE-848_15341093.txt	0	0
AK-918_11183053.txt	0.9929	1
AG-690_13704343.txt	0.0001	0
AK-968_15605685.txt	0.3303	0
AP-263_41317823.txt	0.6018	1
AO-365_15404010.txt	0	0
AS-871_43476689.txt	0	0
AG-690_12134220.txt	0	0
AH-487_41731009.txt	0	0
AG-690_12883741.txt	0	0
AN-329_43449075.txt	0	0
AN-465_43461072.txt	0	0
AF-399_40932903.txt	0.0001	0
AK-777_11655003.txt	0	0
AF-407_13462072.txt	0	0
AK-968_12023018.txt	0	0
AF-399_33192050.txt	0	0
AN-698_42116293.txt	0	0
AF-399_42385937.txt	0	0
AG-205_32672060.txt	0.9567	1
AJ-292_42062306.txt	0	0
AG-205_33175013.txt	0	0
AO-365_43473086.txt	0.9907	1
AN-988_40925961.txt	0	0
AG-690_40699283.txt	0.0003	0
AK-918_15554074.txt	0	0
AG-205_13866016.txt	0	0
AK-968_15359409.txt	0	0
AK-778_41182446.txt	0	0
AG-690_09180054.txt	0	0
AO-548_43279631.txt	0	0
AN-919_15527269.txt	0.0101	0
AM-879_37176006.txt	0.2576	0
AS-871_43476425.txt	0	0
AE-641_30154050.txt	0.0019	0
AN-988_41255413.txt	0.531	1
AO-854_40945200.txt	0	0
AK-968_36977173.txt	0	0
AK-968_36801002.txt	0.0009	0
AN-329_41573518.txt	0	0
AO-080_07165047.txt	0	0
AJ-292_41457253.txt	0.0001	0
AK-968_15607059.txt	0	0
AF-407_31779030.txt	0	0
AO-022_41900351.txt	0.0001	0
AH-487_15020038.txt	0.0381	0
AG-690_34685035.txt	0	0
AT-057_43275414.txt	0	0
AG-690_40816616.txt	0	0
AK-968_41926878.txt	0	0
AM-900_40768090.txt	0.9907	1
AG-690_11634984.txt	0.0476	0
AP-853_41237161.txt	0	0
AG-205_32366044.txt	0.0033	0
AN-465_42767220.txt	0.0062	0
AG-205_14672025.txt	0.9995	1
AK-918_11887003.txt	0	0
AG-690_40720640.txt	0.9999	1
AG-690_40753473.txt	0.0004	0
AQ-713_41690109.txt	0	0
AO-854_43461835.txt	0	0
AG-690_13116002.txt	0	0
AN-329_42612958.txt	0	0
AO-080_43342500.txt	0	0
AG-690_12246091.txt	0	0
AK-968_11986351.txt	0	0
AK-968_11164793.txt	0	0
AG-205_40074327.txt	0	0
AN-648_15596144.txt	0.9955	1
AG-205_40775782.txt	0.0722	0
AH-487_40673024.txt	0	0
AO-364_41189955.txt	0	0
AG-205_12835230.txt	0	0
AK-918_12221140.txt	0.0002	0
AI-204_43489676.txt	0	0
AG-690_15441234.txt	0	0
AF-399_42100239.txt	0	0
AO-548_11634377.txt	0	0
AG-205_36915489.txt	0	0
AN-919_40843070.txt	0.0001	0
AF-399_41725828.txt	0	0
AG-670_11759060.txt	0.6766	1
AK-968_13025196.txt	0	0
AK-968_36944129.txt	0	0
AK-968_41923674.txt	0.0002	0
AK-777_09842010.txt	0.0494	0
AN-758_13190081.txt	0	0
AO-364_14480200.txt	0	0
AG-690_36515015.txt	0	0
AJ-292_14921086.txt	0.0098	0
AK-968_43535084.txt	0	0
AG-205_36450012.txt	0	0
AE-848_41541301.txt	0	0
AG-690_11454150.txt	0	0
AO-476_43250186.txt	0.0001	0
AF-399_15032276.txt	0.0001	0
AN-329_43448572.txt	0.0452	0
AG-690_12766313.txt	0	0
AK-968_15008640.txt	0	0
AN-329_40225599.txt	0.0002	0
AO-022_43452075.txt	0	0
AI-204_31753030.txt	0.0024	0
AF-399_40827564.txt	0	0
AG-690_40146707.txt	0.0002	0
AG-690_36281047.txt	0.3449	0
AK-968_41924051.txt	0	0
AI-204_31759004.txt	0	0
AK-968_12118318.txt	0	0
AE-848_11420661.txt	0.0047	0
AG-690_11962716.txt	0	0
AP-845_41779811.txt	0	0
AT-057_43348294.txt	0	0
AK-968_40731985.txt	0	0
AK-968_13025327.txt	0	0
AP-970_43482207.txt	0	0
AJ-292_41694677.txt	0	0
AK-105_40832905.txt	0.0009	0
AM-807_13104348.txt	0	0
AQ-088_42014067.txt	0.0004	0
AG-205_08522038.txt	0.0065	0
AG-690_08754057.txt	0.0035	0
AK-918_42688669.txt	0.1365	0
AG-690_34153042.txt	0.0001	0
AS-871_43477394.txt	0	0
AF-399_11787732.txt	0	0
AG-690_12869675.txt	0.9968	1
AK-968_40708136.txt	0	0
AN-465_41991331.txt	0	0
AQ-390_42215431.txt	0.0011	0
AK-968_41924404.txt	0	0
AK-968_43547689.txt	0.0386	0
AP-845_41670241.txt	0	0
AN-652_42190980.txt	0.9994	1
AK-968_15253129.txt	0	0
AN-652_43163222.txt	0.0012	0
AG-690_15438028.txt	0	0
AG-205_36729059.txt	0.0001	0
AN-465_13570071.txt	0	0
AK-968_40641862.txt	0.0011	0
AT-057_43486124.txt	0	0
AG-690_10485044.txt	0	0
AO-081_40800232.txt	0.0001	0
AP-145_43484708.txt	0.9764	1
AF-399_32023047.txt	0	0
AJ-916_41045971.txt	0.0006	0
AN-698_41081386.txt	0.0002	0
AO-079_15259065.txt	0	0
AG-690_33780022.txt	0.0169	0
AP-501_42284036.txt	0.1474	0
AN-953_13445018.txt	0.4833	0
AG-690_40639054.txt	0	0
AN-465_41672227.txt	0	0
AK-968_40735315.txt	0.9144	1
AU-059_43522183.txt	0	0
AK-105_40693332.txt	0	0
AK-968_40641883.txt	0	0
AK-968_37171161.txt	0	0
AG-690_11060010.txt	0	0
AP-355_42579255.txt	0	0
AF-399_14031090.txt	0	0
AJ-292_41944071.txt	0.0723	0
AK-968_12383375.txt	0	0
AN-329_43465198.txt	0	0
AQ-432_43400337.txt	0	0
AO-022_43453284.txt	0	0
AH-034_11650247.txt	0.0004	0
AG-690_11835113.txt	0	0
AG-690_11960821.txt	0	0
AN-919_37393009.txt	0	0
AK-918_13033044.txt	0.0021	0
AE-641_14883083.txt	0	0
AR-360_42760695.txt	0	0
AG-690_32513024.txt	0	0
AG-205_37023027.txt	0	0
AE-641_00352056.txt	0.4284	0
AG-205_32375030.txt	0	0
AG-205_33112064.txt	0	0
AS-871_43475942.txt	0.0006	0
AG-205_13381093.txt	0.0001	0
AN-329_40901055.txt	0.0001	0
AN-329_41563779.txt	0	0
AK-968_40707959.txt	0	0
AG-690_12884162.txt	0.0001	0
AN-648_41221467.txt	0	0
AG-205_12140250.txt	0.4908	0
AK-778_37026083.txt	0	0
AK-968_40708052.txt	0	0
AG-690_08509058.txt	0	0
AI-204_31687058.txt	0.0001	0
AK-968_15363356.txt	0.0001	0
AP-970_43492144.txt	0.0173	0
AO-476_43380251.txt	0.0003	0
AK-968_11575275.txt	0.0792	0
AE-641_12642113.txt	0	0
AK-968_15359281.txt	0	0
AI-204_31679026.txt	0	0
AP-145_43484698.txt	0.0005	0
AJ-292_15251175.txt	0.0002	0
AG-690_36921272.txt	0.0299	0
AE-848_36648043.txt	0	0
AG-690_11086048.txt	0.0159	0
AG-690_15442884.txt	0.9896	1
AK-968_11841639.txt	0	0
AN-651_43112650.txt	0.0209	0
AA-768_34978013.txt	0	0
AN-465_41523530.txt	0	0
AG-205_40130469.txt	0	0
AK-968_13148825.txt	0	0
AQ-911_41962468.txt	0.4758	0
AO-022_43512452.txt	0.1892	0
AG-690_13703118.txt	0	0
AN-698_40782033.txt	0.0002	0
AK-968_13148348.txt	0	0
AE-848_32730001.txt	0	0
AK-968_41022317.txt	0.9956	1
AN-652_43024320.txt	0	0
AE-473_30516019.txt	0	0
AG-690_40697902.txt	0	0
AG-205_36957037.txt	0	0
AP-970_42167046.txt	0	0
AG-690_40637706.txt	0.0449	0
AH-487_40686810.txt	0	0
AE-641_12110160.txt	0	0
AP-970_42837705.txt	0.0004	0
AO-022_43514497.txt	0	0
AN-329_42667813.txt	0	0
AH-034_36853001.txt	0.0001	0
AO-299_14171011.txt	0.0001	0
AG-690_12403065.txt	0	0
AN-465_42886542.txt	0	0
AG-690_33449045.txt	0	0
AG-205_33148008.txt	0.5876	1
AG-205_12760314.txt	0	0
AM-879_41237152.txt	0	0
AE-641_15338006.txt	0.093	0
AG-690_12474075.txt	0.0004	0
AK-918_41197984.txt	0.3291	0
AK-968_43540717.txt	0.0001	0
AP-263_42234129.txt	0	0
AQ-088_41086480.txt	0.0012	0
AN-652_41041826.txt	0	0
AH-487_42194832.txt	0	0
AK-968_41925042.txt	0.0013	0
AN-329_40184125.txt	0	0
AN-329_13038788.txt	0.9997	1
AN-329_42685662.txt	0	0
AP-263_42234177.txt	0	0
AM-879_40861532.txt	0	0
AO-299_15048134.txt	0.109	0
AK-968_15362071.txt	0	0
AO-365_43264681.txt	0.0005	0
AK-968_15359849.txt	0	0
AC-776_41252563.txt	0	0
AH-487_14753040.txt	0	0
AK-968_15603296.txt	0.0001	0
AK-968_41172293.txt	0	0
AN-329_11140524.txt	0	0
AK-968_15359719.txt	0	0
AT-057_42485587.txt	0	0
AO-365_43473016.txt	0.8727	1
AK-968_37032050.txt	0	0
AN-922_40702443.txt	0.9941	1
AP-970_43469675.txt	0	0
AK-968_15359844.txt	0.9746	1
AK-968_41024625.txt	0.0004	0
AN-329_40602085.txt	0.002	0
AG-205_40132550.txt	0	0
AG-205_12424056.txt	0.9996	1
AO-081_40841907.txt	0	0
AE-848_30701030.txt	0.0564	0
AG-690_40700956.txt	0.0001	0
AI-942_13331658.txt	0	0
AQ-750_42502134.txt	0	0
AG-690_40700519.txt	0.0013	0
AJ-091_14842006.txt	0	0
AE-848_33215012.txt	0	0
AN-465_43506518.txt	0	0
AG-690_33779062.txt	0.0459	0
AK-968_12632434.txt	0.0037	0
AG-205_12759757.txt	0	0
AK-968_41924795.txt	0	0
AG-690_40756406.txt	0.0013	0
AG-205_14552051.txt	0	0
AM-879_42009751.txt	0	0
AK-968_11566017.txt	0	0
AP-685_41280891.txt	0	0
AE-848_14761050.txt	0.0048	0
AG-690_36946061.txt	0	0
AP-853_41861974.txt	0	0
AP-906_42087483.txt	0.0122	0
AK-778_41314784.txt	0	0
AN-693_12934033.txt	0.0009	0
AO-080_42576035.txt	0	0
AP-970_41682423.txt	0.0031	0
AG-670_36148040.txt	0	0
AK-968_12572002.txt	0.9792	1
AQ-390_42869257.txt	0	0
AO-476_43407375.txt	0	0
AG-205_08343033.txt	0	0
AF-399_41115217.txt	0	0
AN-329_40614049.txt	0	0
AO-854_43450524.txt	0	0
AU-004_43508203.txt	0	0
AG-205_37234023.txt	0.0005	0
AK-968_41169476.txt	0	0
AG-205_37224021.txt	0.0001	0
AG-690_13507757.txt	0.0421	0
AG-690_33251018.txt	0.0002	0
AO-548_43317722.txt	0	0
AN-919_41439973.txt	0	0
AN-329_43448305.txt	0	0
AP-964_41446716.txt	0	0
AS-871_43478536.txt	0	0
AH-487_11778084.txt	0.0004	0
AN-988_14855018.txt	0	0
AN-648_14912051.txt	0.0121	0
AG-205_33674023.txt	0	0
AK-968_10637046.txt	0	0
AK-968_11367379.txt	0	0
AH-487_41280573.txt	0.0155	0
AE-848_36959047.txt	0	0
AN-465_42519274.txt	0.0192	0
AG-205_11115163.txt	0	0
AK-968_12264178.txt	1	1
AE-848_11245292.txt	0	0
AG-205_15155101.txt	0	0
AK-968_15253198.txt	0.0015	0
AT-057_43314350.txt	0.0002	0
AG-690_12410050.txt	0.436	0
AP-263_40917607.txt	0	0
AJ-091_33281034.txt	0.0004	0
AG-690_15430394.txt	0.1069	0
AG-690_40699766.txt	0.3028	0
AG-690_11632315.txt	0	0
AO-081_13877056.txt	0	0
AK-968_40599630.txt	0	0
AG-690_12892618.txt	0	0
AG-690_11629054.txt	0.002	0
AK-968_12515683.txt	0	0
AK-968_15362310.txt	0	0
AQ-390_40898056.txt	0.0003	0
AN-465_42889417.txt	0	0
AF-399_37244021.txt	0	0
AI-298_32905058.txt	0.8911	1
AG-205_11606282.txt	0	0
AN-329_43448335.txt	0	0
AP-906_41928052.txt	0.0002	0
AO-081_15245149.txt	0	0
AP-263_41967886.txt	0.0003	0
AP-263_43502824.txt	0	0
AT-057_43469439.txt	0	0
AP-355_42579245.txt	0	0
AK-968_37055079.txt	0	0
AK-968_15603662.txt	0	0
AG-690_10517029.txt	0.0252	0
AG-227_37394007.txt	0	0
AF-399_42675561.txt	0	0
AQ-088_42013335.txt	0	0
AK-968_11283102.txt	0.0056	0
AP-501_43300368.txt	0.9285	1
AO-854_43445274.txt	0	0
AO-081_41040091.txt	0.0577	0
AK-968_43551470.txt	0	0
AP-982_41090460.txt	0	0
AG-690_36877012.txt	0.2002	0
AN-329_15538265.txt	0	0
AP-970_43482663.txt	0.9963	1
AN-329_43465151.txt	0	0
AK-968_40735030.txt	0	0
AN-465_43421577.txt	0.0002	0
AN-979_14697029.txt	0	0
AP-970_43202695.txt	0	0
AN-698_40780673.txt	0	0
AN-919_14384207.txt	0	0
AG-219_11789364.txt	0.0181	0
AH-262_01736006.txt	0	0
AD-193_42475510.txt	0.0001	0
AG-690_33367052.txt	0	0
AN-329_40795640.txt	0	0
AL-281_42013084.txt	0	0
AN-329_40514487.txt	0	0
AN-329_05697031.txt	0	0
AF-399_40827594.txt	0	0
AI-204_31681058.txt	0	0
AH-487_42145519.txt	0	0
AG-690_11085060.txt	0.0002	0
AF-399_41320393.txt	0.0005	0
AO-022_43453215.txt	0	0
AG-690_11668637.txt	0.0026	0
AG-690_11821781.txt	0	0
AN-329_42613556.txt	0	0
AK-968_15361994.txt	0	0
AH-487_15274143.txt	0	0
AM-781_14748001.txt	0	0
AG-690_15438920.txt	0	0
AP-786_42299983.txt	0.0038	0
AG-205_40068383.txt	0.1665	0
AP-263_43502757.txt	0	0
AK-968_43566947.txt	0.7082	1
AN-329_42294917.txt	0	0
AP-970_43030179.txt	0.991	1
AH-357_02177041.txt	0	0
AK-968_15361134.txt	0.001	0
AG-690_10212018.txt	0.2203	0
AP-263_40947127.txt	0	0
AG-690_40750529.txt	0	0
AG-690_40697761.txt	0.8754	1
AS-871_42217326.txt	0	0
AP-263_43502934.txt	0	0
AN-989_41696517.txt	0.6264	1
AO-081_42095676.txt	0	0
AG-690_11450069.txt	0	0
AF-399_15392208.txt	0	0
AJ-292_34008037.txt	0	0
AG-205_41005488.txt	0	0
AG-690_13508121.txt	0.9152	1
AH-487_41184847.txt	0.0001	0
AO-365_43472984.txt	1	1
AN-465_42887224.txt	0	0
AP-970_43375265.txt	0	0
AK-968_12119278.txt	0	0
AQ-149_43414576.txt	0.0006	0
AP-263_43371403.txt	0	0
AN-465_42833593.txt	0	0
AF-399_33695006.txt	0	0
AO-365_12757669.txt	0	0
AP-263_43503005.txt	0	0
AK-968_40709086.txt	0.0161	0
AK-968_11367300.txt	0	0
AG-690_34158005.txt	0.8799	1
AK-105_40831862.txt	0	0
AQ-432_42299779.txt	0	0
AO-081_40926788.txt	0.0001	0
AG-205_15424414.txt	0	0
AG-690_15433665.txt	0.0041	0
AN-329_42613056.txt	0	0
AT-057_43485369.txt	0	0
AG-205_15425418.txt	0.0068	0
CS-006_03885008.txt	0	0
AO-365_43401191.txt	0.436	0
AG-205_13381022.txt	0	0
AG-205_11975034.txt	0	0
AH-487_41656099.txt	0	0
AF-628_30886021.txt	0.0001	0
AK-778_43413643.txt	0.0001	0
AF-399_15539267.txt	0.4329	0
AG-690_15442555.txt	0	0
AG-690_12889535.txt	0	0
AE-848_13196112.txt	0.0001	0
AG-690_36880007.txt	0.0024	0
AJ-797_43492786.txt	0	0
AK-968_15361953.txt	0	0
AB-131_42301540.txt	0.999	1
AK-968_41021164.txt	0.7702	1
AG-690_40751977.txt	0	0
AG-205_09775061.txt	0	0
AP-501_42302407.txt	0	0
AJ-333_36116038.txt	0	0
AK-968_41022189.txt	0	0
AH-262_15405007.txt	0.0113	0
AT-057_40101682.txt	0	0
AN-329_15538086.txt	0	0
AP-906_41078837.txt	0	0
AH-034_32857049.txt	0.0173	0
AG-670_13120074.txt	0	0
AG-219_36432026.txt	0.0001	0
AG-690_15435843.txt	0	0
AO-365_43113593.txt	0.9998	1
AN-742_37279023.txt	0	0
AK-968_41926958.txt	0.0244	0
AG-205_40121322.txt	0	0
[truncated: 327,375+ more rows]
